# Supplementary material
Source: PubMed Central journal article supplement (PMC4601523)

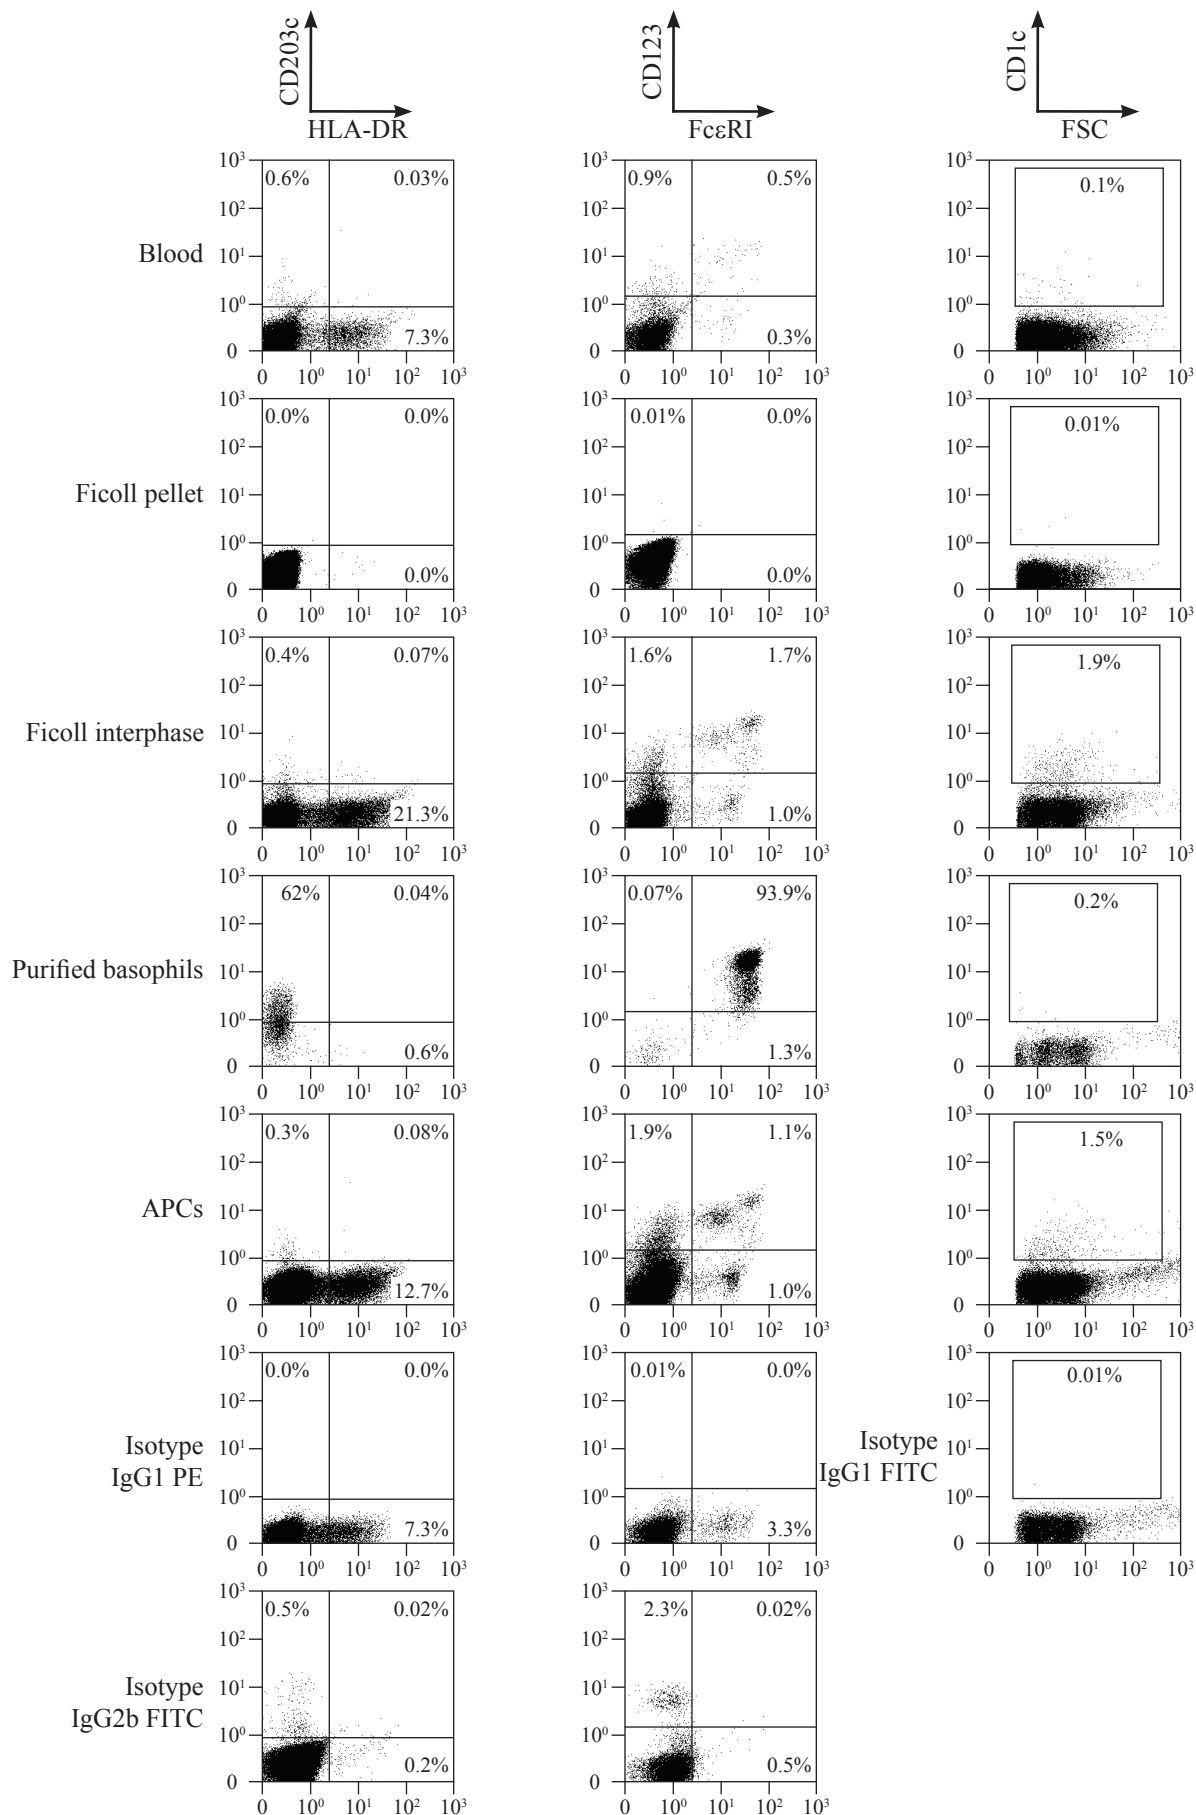

Supplementary Figure 1

Supplement: NIHMS63503-supplement-Fig__S1.pdf [file NIHMS63503-supplement-Fig__S1.pdf]

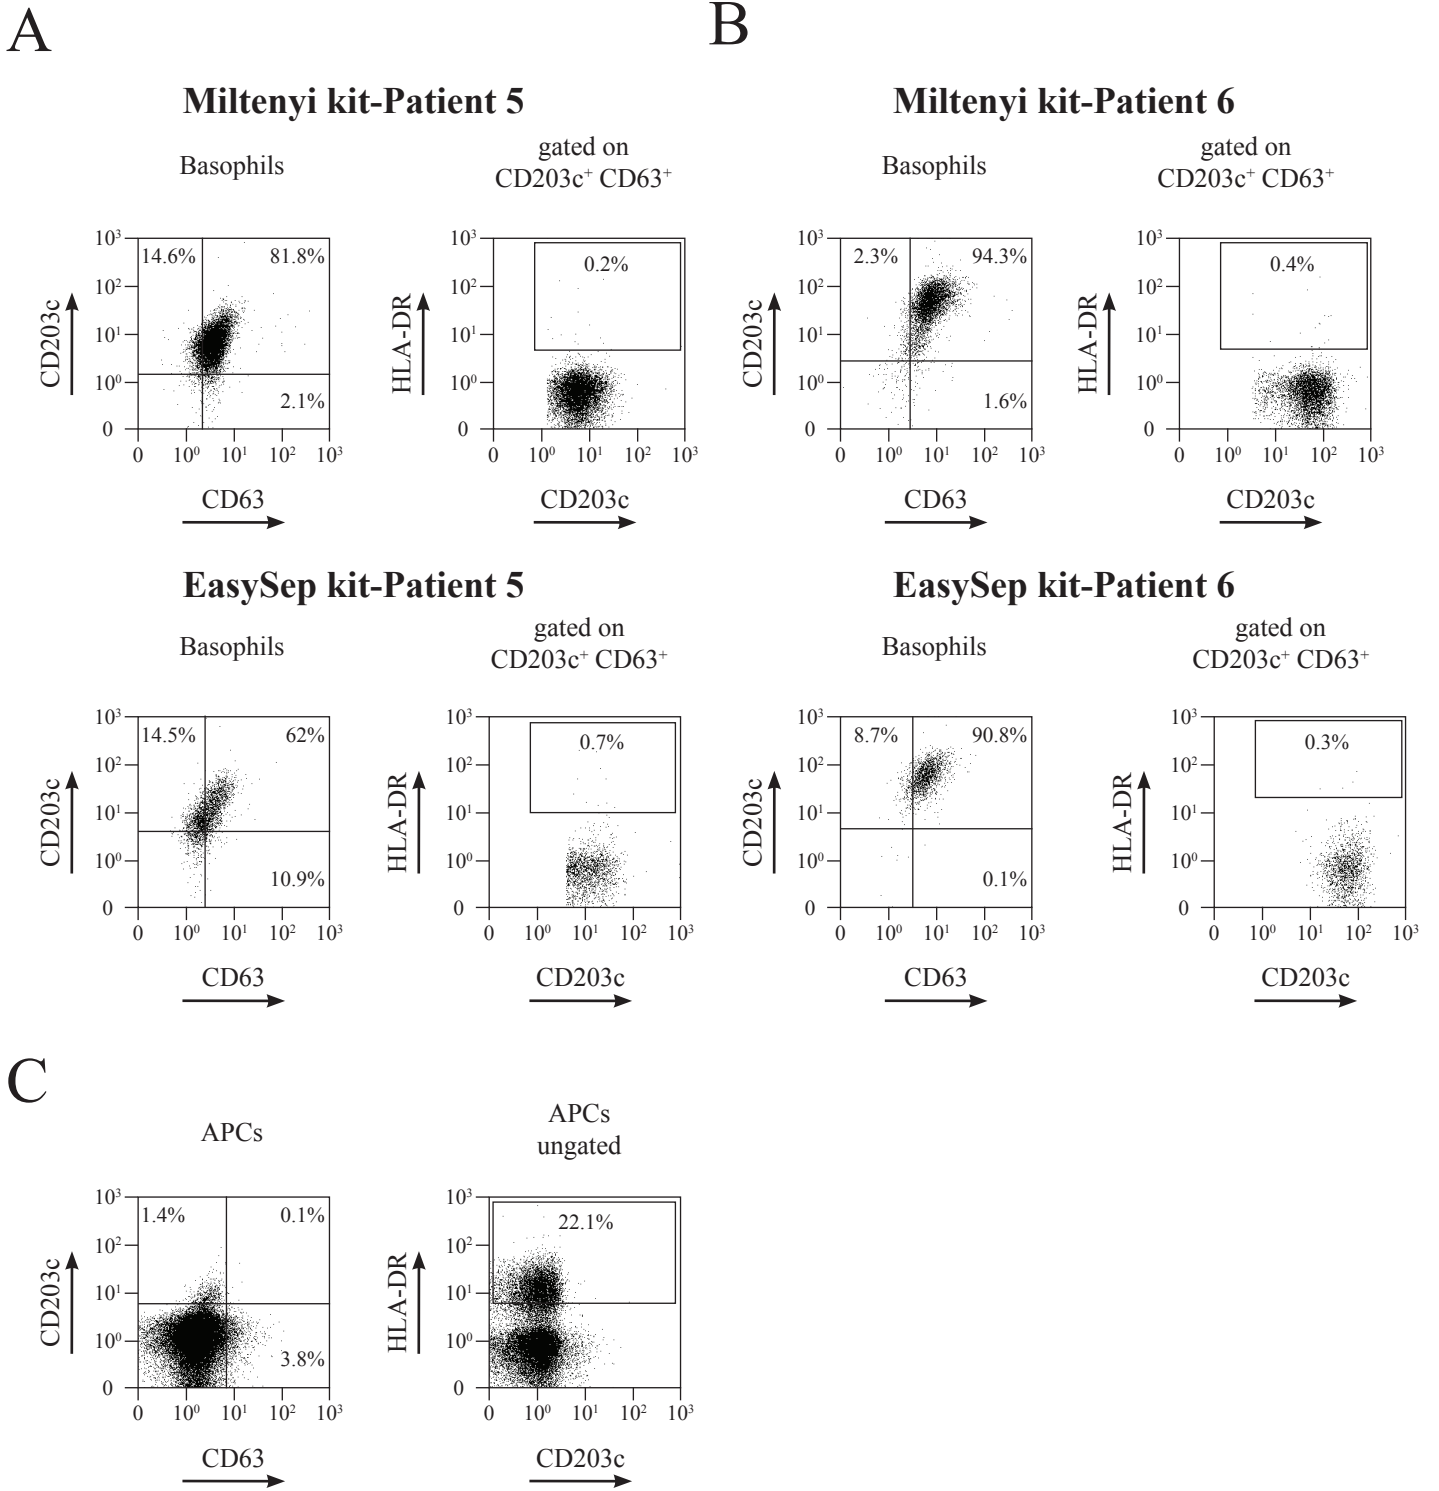

Supplement: NIHMS63503-supplement-Fig__S2.pdf [file NIHMS63503-supplement-Fig__S2.pdf]

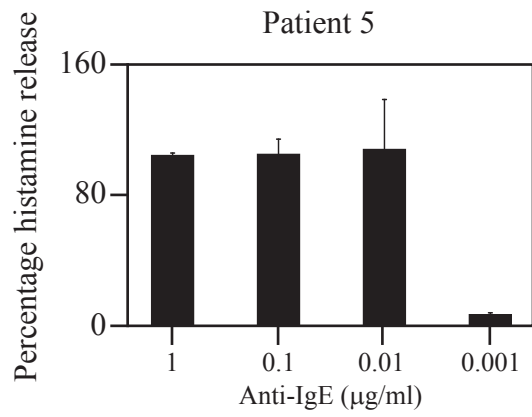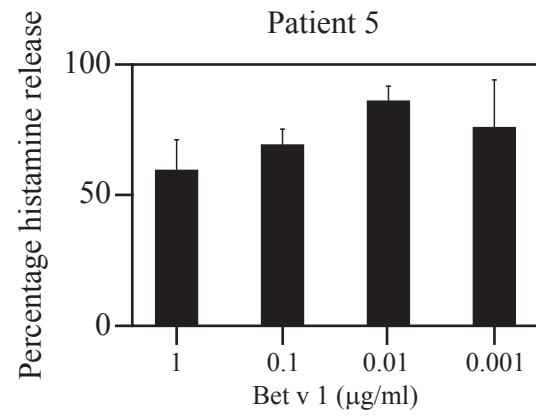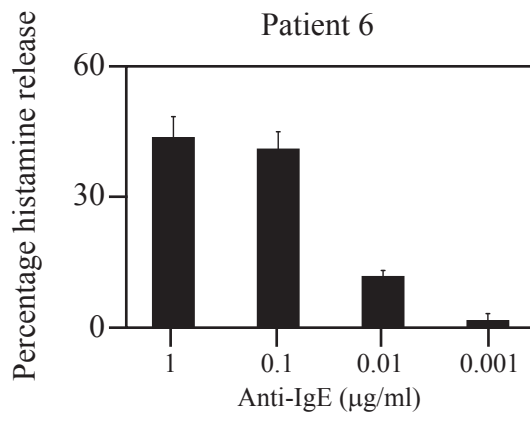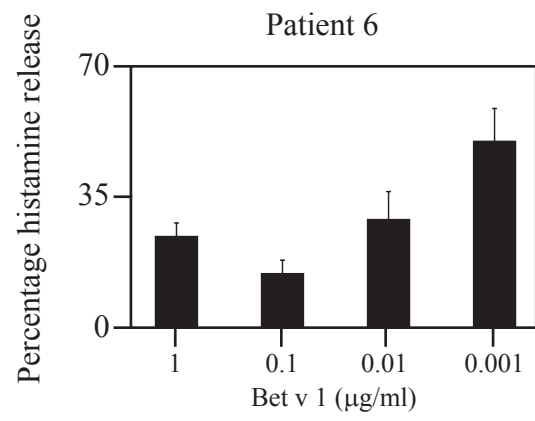

Supplement: NIHMS63503-supplement-Fig__S3.pdf [file NIHMS63503-supplement-Fig__S3.pdf]

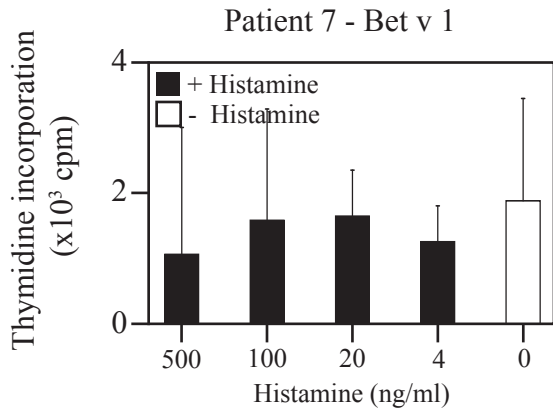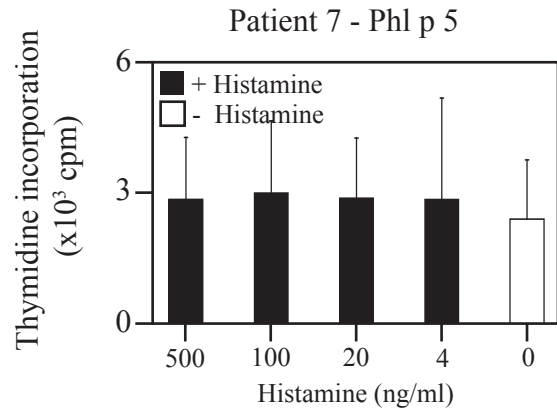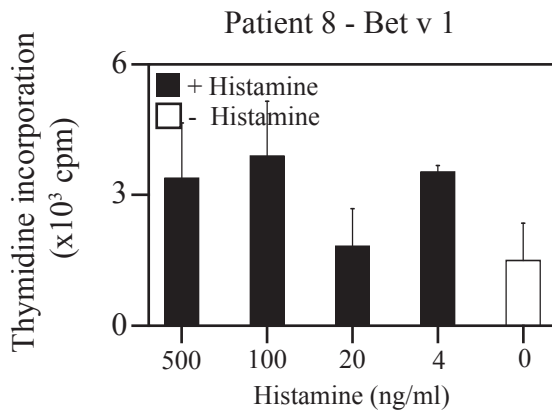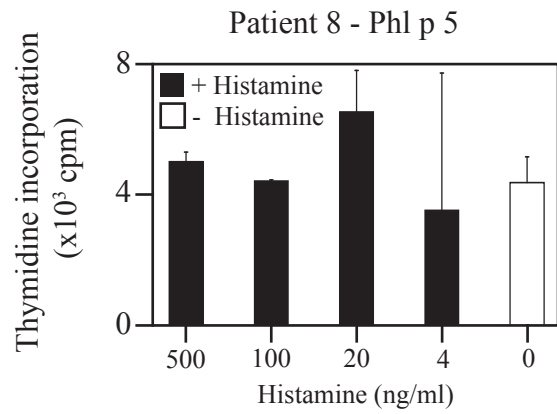

Supplement: NIHMS63503-supplement-Fig__S4.pdf [file NIHMS63503-supplement-Fig__S4.pdf]
